# Supplementary material for: Role of the Scavenger Receptor CD36 in Accelerated Diabetic Atherosclerosis
Source: Preprints.org preprint supplement (doi:10.20944/preprints202008.0083.v1), 2020-08-04
Supplement: Supplementary file 2 [file supplementary]

**Supplementary material**

**Role of the scavenger receptor CD36 in diabetic accelerated atherosclerosis**

Miquel Navas-Madroñal1*, Esmeralda Castelblanco3,4*, Mercedes Camacho1,2, Marta Consegal1, Anna Ramirez-Morros5, Maria Rosa Sarrias6, Paulina Perez7, Nuria Alonso4,5, María Galán1,2†, Dídac Mauricio3,4†.

### Corresponding authors:

Dídac Mauricio

Department of Endocrinology & Nutrition

Hospital de la Santa Creu i Sant Pau

Sant Quintí, 89

08041 Barcelona, Spain

TEL: +34 93 556 56 61; FAX: 93 556 56 02

E-mail: [didacmauricio@gmail.com](mailto:didacmauricio@gmail.com)

María Galán

Sant Pau Biomedical Research Institute  (IIB Sant Pau)

Hospital de la Santa Creu i Sant Pau

Avda. Sant Antoni Maria Claret, 167

08025 Barcelona. Spain.

TEL: +34 93 556 56 22 / 5711; FAX: +34 93 556 55 59

E-mail: [mgalana@santpau.cat](mailto:mgalana@santpau.cat)

**Figure Supplementary 1. CD36 expression in VSMC in response to increasing concentrations of glucose ± oxLDL.** Starved VSMC were cultured for 72 h with M199 medium containing 5 mM (normal glucose, NG), 15 mM, 22 mM or 30 mM of glucose. CD36 mRNA levels were determined by quantitative real Time PCR analysis (qPCR) and normalized to GAPDH. Mean fold change relative to 5 mM (NG) ± SEM from four independent experiments performed in duplicate are shown. One-way ANOVA test was performed for statistical significance: **p*≤ 0.05 vs 5 mM; #*p*≤ 0.05 vs 22 mM; ***p*≤ 0.01 vs 5 mM; ##*p*≤ 0.01 vs 22 mM.

**Figure Supplementary 2. Co-incubation of VSMC with recombinant human CD5L blunts CD36 induction but does not affect to inflammatory markers expression. A-D)** CD36, MCP1, IL6 and IL-1β mRNA levels were determined by qPCR analysis and normalized to GAPDH after co-incubation with rCD5L for 48 h (N=5). **p*≤ 0.05 vs 5 mM; #*p*≤ 0.05 vs 22 mM; $*p*≤ 0.05 vs 22 mM+oxLDL; ***p*≤ 0.01 vs 5 mM.

**Figure Supplementary 3. Expression of calcification markers in VSMC exposed to HG ± oxLDL.** The expression of bone matrix proteins that regulate the calcification process were induced in VSMC cultured with high glucose for 72 h. **A-C)** Alkaline phosphatase (ALPL), Secreted phosphoprotein 1 (SPP1) and Bone morphogenetic protein 2 (BMP2) mRNA levels were determined by qPCR analysis and normalized to GAPDH. Mean fold change relative to cultured VSMC in NG medium ± SEM (N=4). **p*≤ 0.05 vs 5 mM or 5 mM+CD5L; #*p*≤ 0.05 vs 22 mM or 22 mM+CD5L; $*p*≤ 0.05 vs 22mM+oxLDL.

**Figure Supplementary 4.** VSMC were transfected with siRNA-CT or siRNA-CD36 and cultured in osteogenic medium for 10 days with NG or HG ± oxLDL. **A)** Quantification of alizarin red staining by colorimetry. **B)** Quantification of alizarin red staining by imaging analysis. Results are expressed as mean ± SEM (N=5). ******p*<0.05 *vs*. 5 mM siRNA-CT; #*p*<0.05 *vs* 22 mM siRNA-CT; $p<0.05 *vs*. 5mM+oxLDL or 22 mM+oxLDL siRNA-CT.
